# Supplementary material
Source: Springer Nature journal article supplement (https://www.springermedizin.de/resource/supplementary/12993_2011_362_MOESM2_ESM.pdf/9617622)

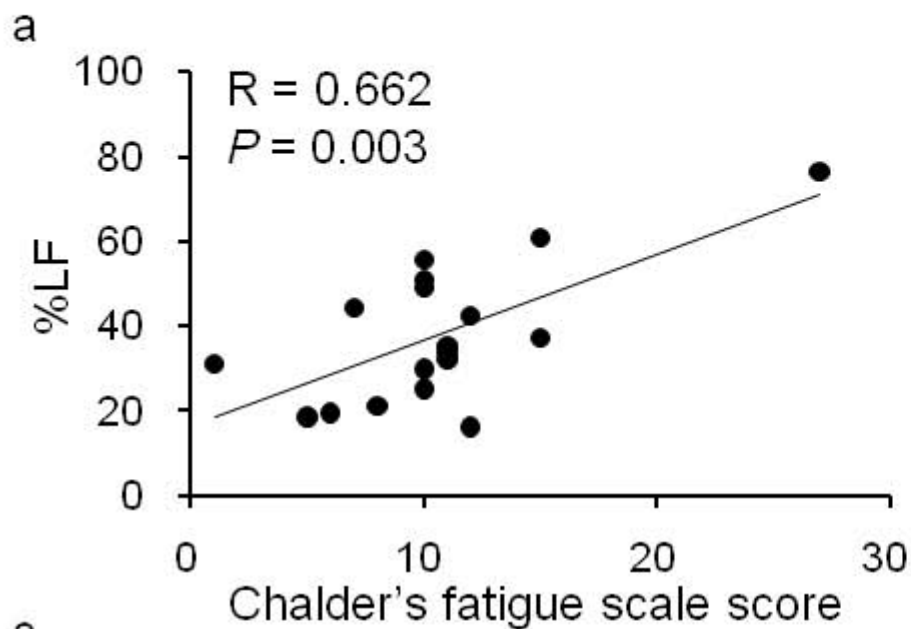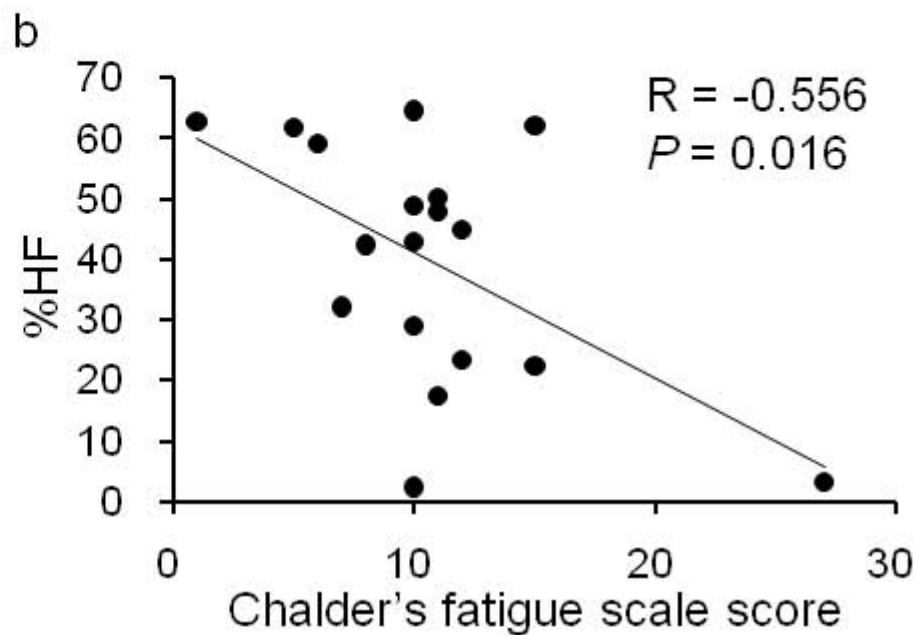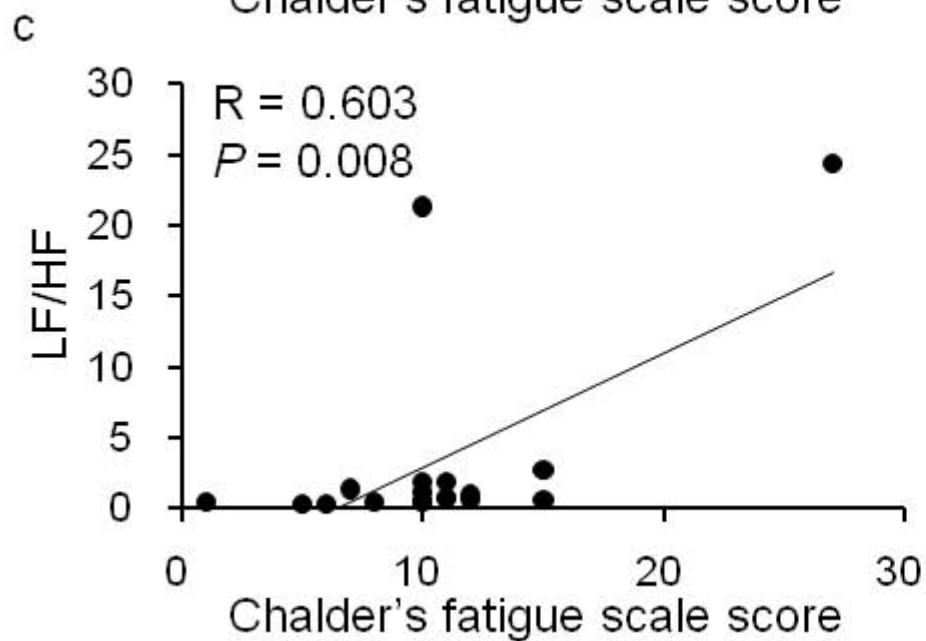

Supplement: MOESM2 [file 9617622]
